# Supplementary material for: Sulfur dioxide (SO 2 ) as observed by MIPAS/Envisat: temporal development and spatial distribution at 15–45 km altitude
Source: Copernicus journal article supplement (doi:10.5194/acp-13-10405-2013), 2013-10-29
Supplement: Supplementary file 1 [file acp-13-10405-2013-supplement.pdf]

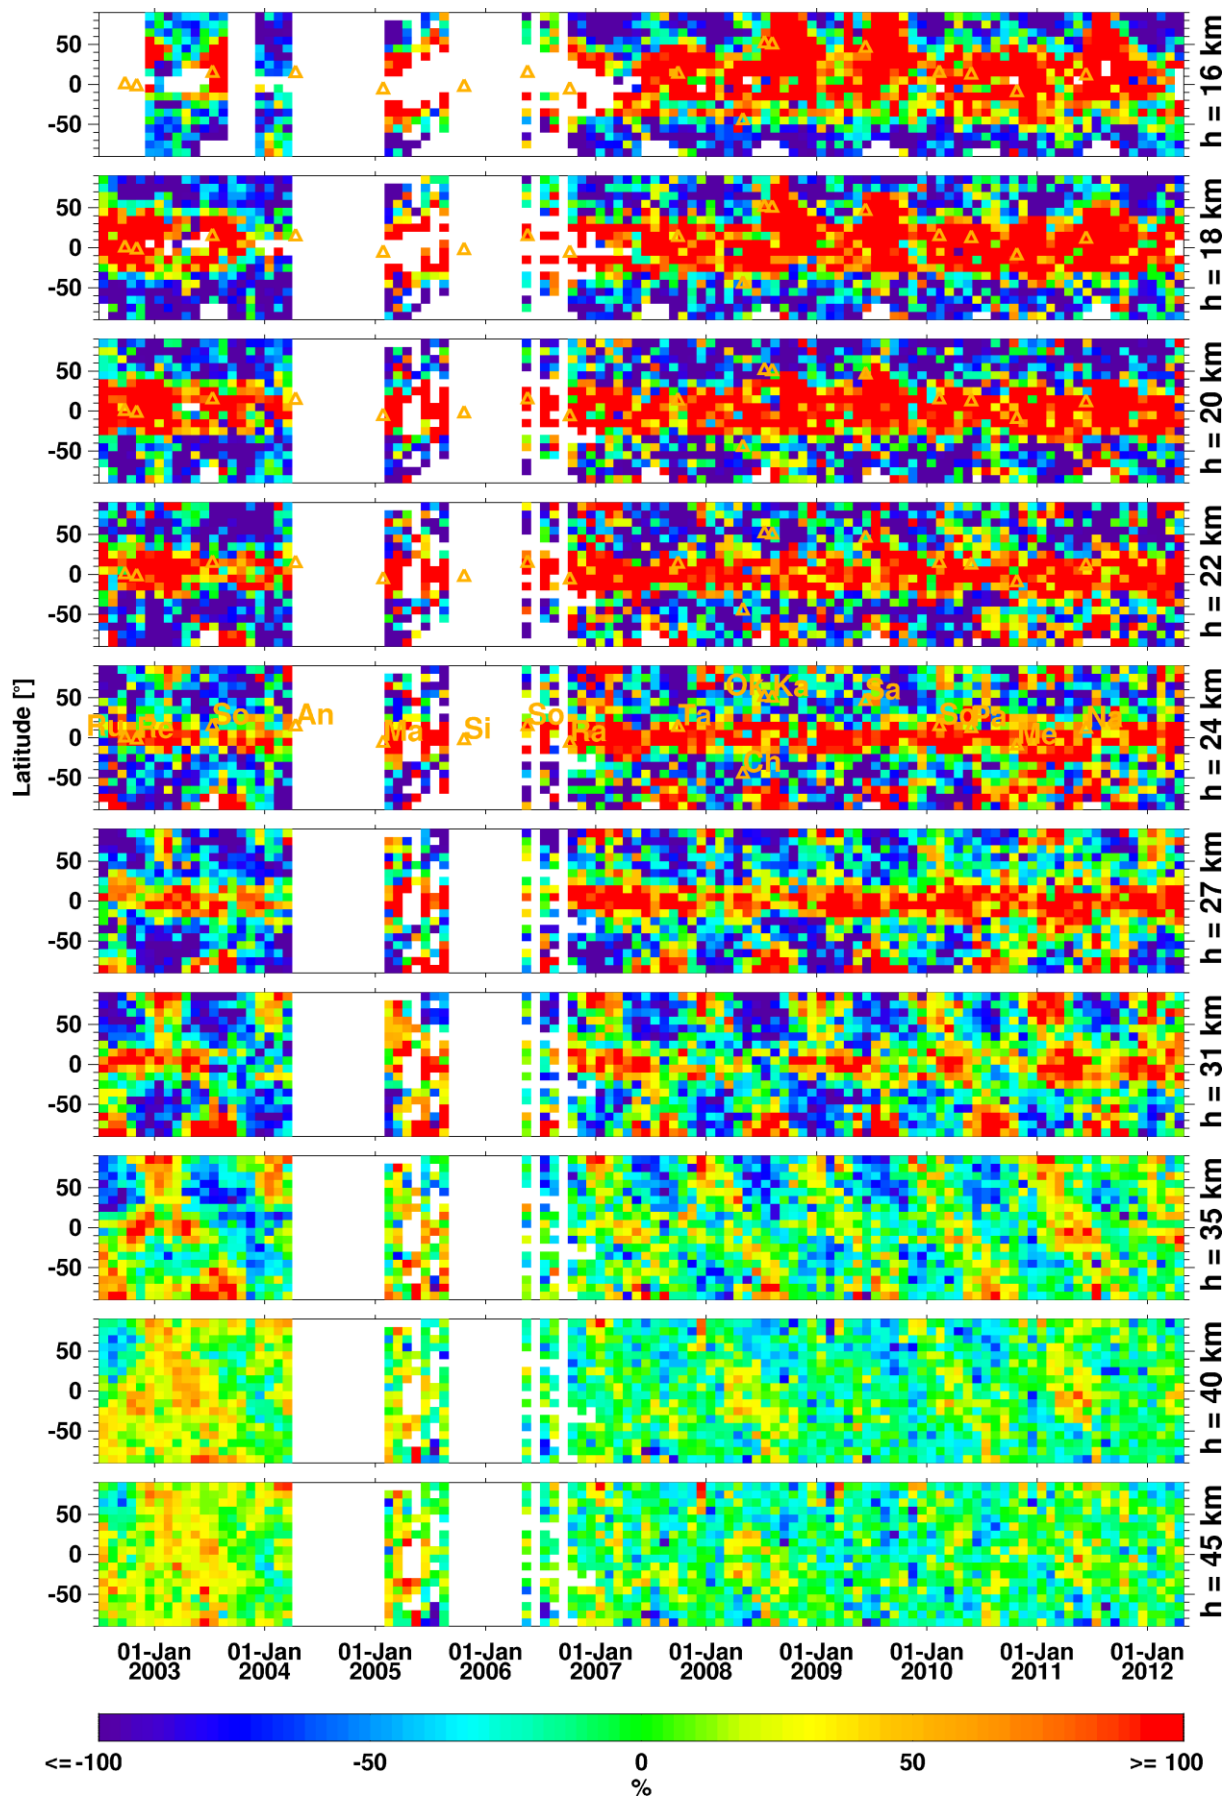

**Fig. 1.** Same as Fig. 6 of the paper but variation of SO<sub>2</sub> relative to the mean for each altitude (scale: -100% - +100%).

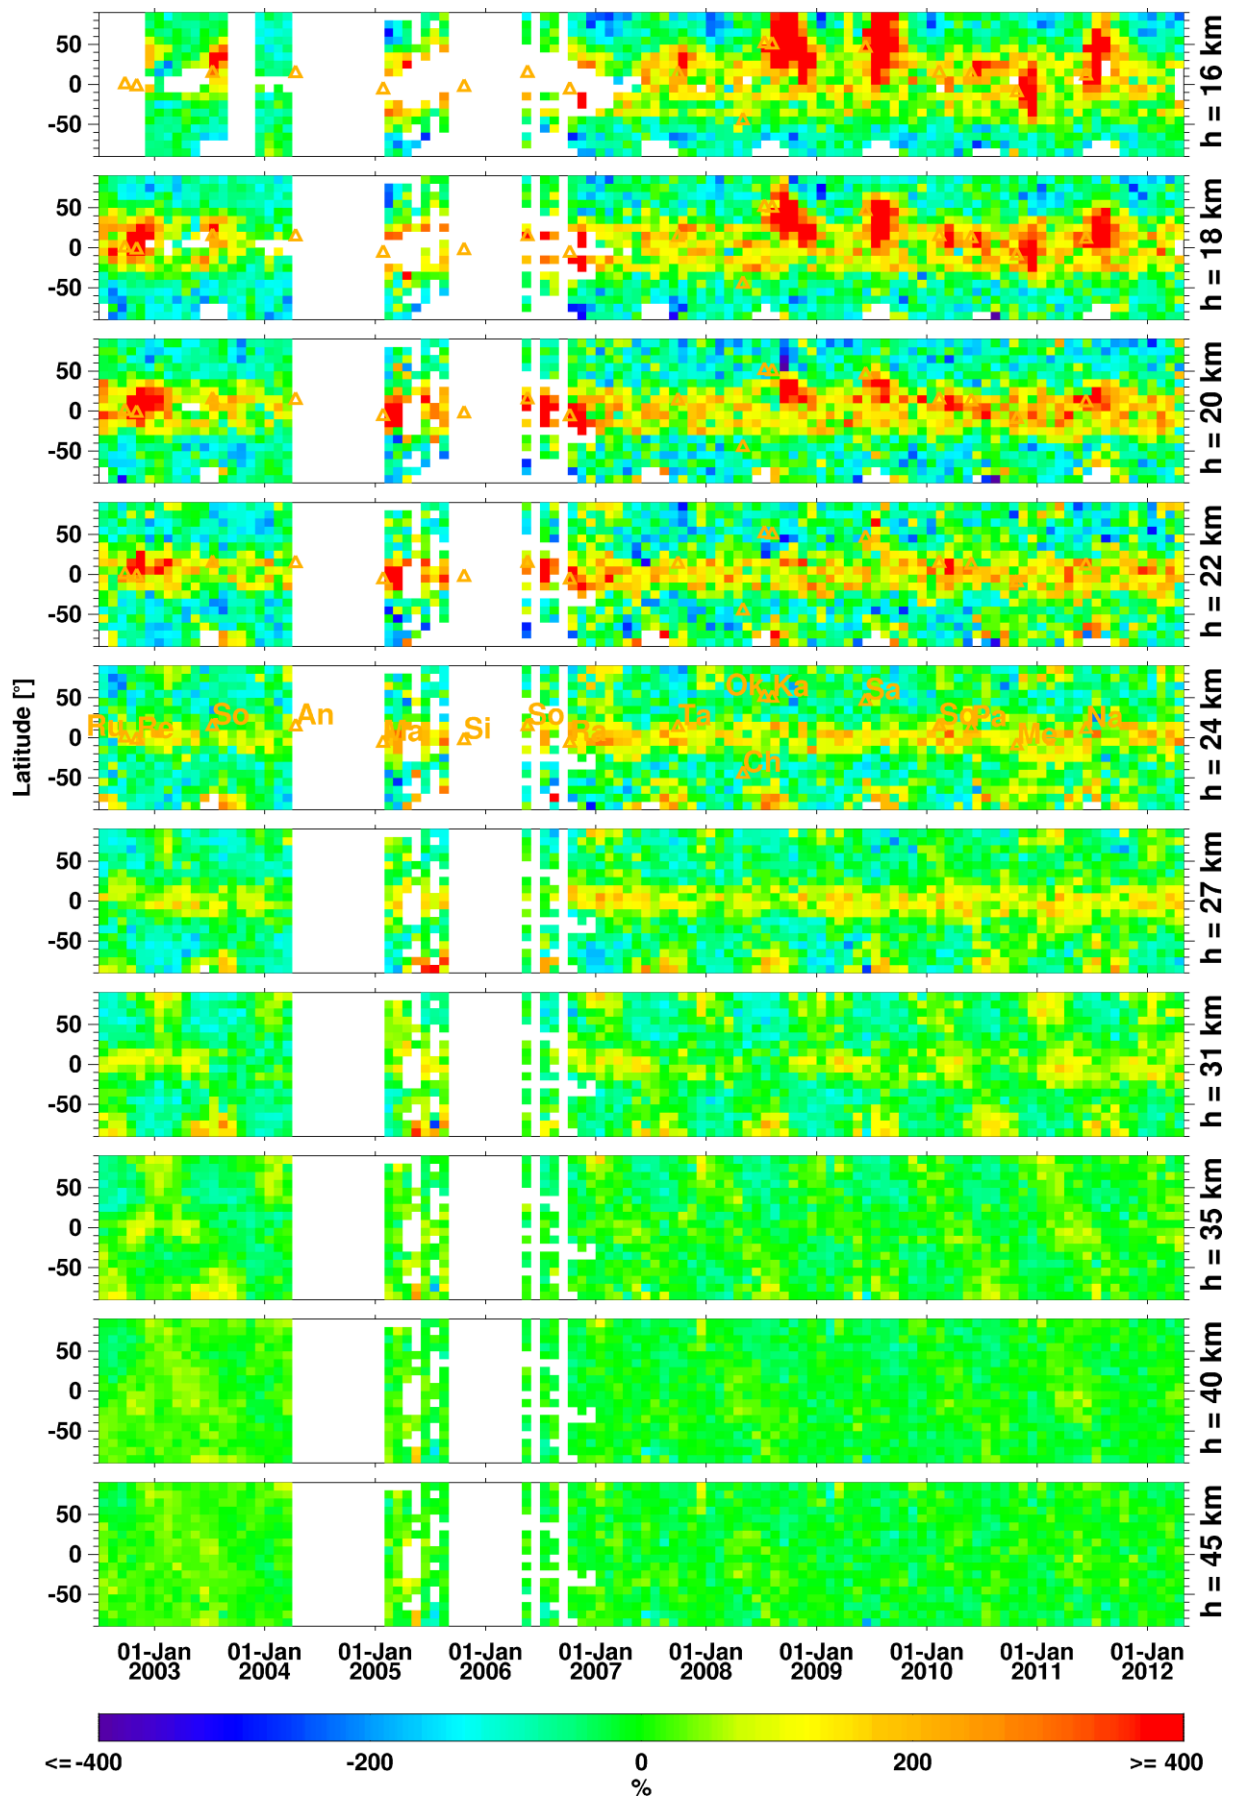

**Fig. 2.** Same as Fig. 6 of the paper but variation of SO<sub>2</sub> relative to the mean for each altitude (scale: -400% - +400%).
